# Supplementary material for: Monitoring the Season–Prevalence Relationship of Vairimorpha ceranae in Honey Bees (Apis mellifera) over One Year and the Primary Assessment of Probiotic Treatment in Taichung, Taiwan
Source: MDPI journal article supplement (doi:10.3390/insects15030204), 2024-03-19
Supplement: s1 [file s1]

# **Monitoring the season-prevalence relationship of *Vairimorpha ceranae* in honey bees (*Apis mellifera*) over one year and primary assessment of probiotic treatment**

**Yi-Hsuan Li<sup>1</sup>, Yu-Shin Chen<sup>2</sup>, Fang-Min Chang<sup>2</sup>, Ming-Cheng Wu<sup>1, 2\*</sup>, Yu-Shin Nai<sup>1, 2\*</sup>**

<sup>1</sup> Doctoral Program in Microbial Genomics, National Chung Hsing University and Academia Sinica, Taiwan.

<sup>2</sup> Department of Entomology, National Chung Hsing University, Taichung, Taiwan.

\*Correspondence: Ming-Cheng Wu: mcwu@nchu.edu.tw; Yu-Shin Nai:

ysnai@nchu.edu.tw

## **Supplementary Materials**

## **Supplementary Methods**

### **DNA extraction**

Total 100 µL of the homogenized suspension was used for DNA extraction by EDNA HISPEX (Easy DNA High-Speed Extraction) Tissue Kit (Fisher Biotec, Australia). Briefly, 64 µL of solution 1A and 16 µL of solution 1B was mixed with 100 µL homogenized suspension, incubated at 95 °C for 20 minutes, then mixed with

20  $\mu$ L solution 2 for total 200  $\mu$ L. The DNA sample was then 100-fold diluted with sterilized ddH<sub>2</sub>O and store at  $-20^{\circ}\text{C}$  until used.

### **Absolutely quantitation of *V. ceranae* genome copy number**

For the absolutely quantitation, a standard curve based on the serial-dilution of Nc-MSP was established as followed; Centrifuged at  $16000 \times g$  for 3 min to removed midgut tissue of honey bees and the  $1 \times 10^7$  spores per mL were harvest from the homogenized suspension as described above. The DNA was extracted as described above and then 10-fold serial dilution was performed for seven times to prepare the DNA sample with the spore concentrations from  $1 \times 10^6$  spore / mL to  $1 \times 10^0$  per mL. These DNA samples were subjected to real-time quantitative PCR (qPCR) to generate the standard curve of *V. ceranae* genome ( $y = -3.3043x + 37.909$   $R^2 = 0.9894$ ). For qPCR, the ribosomal RNA gene specific primer set was design: SSU-F: 5'- CCCTGACTGGACGAACAGAAG-3'; SSU-R: 5'-

CCAGCTTACGTCCTTGTTCAA A-3' was used to quantify the genome copy number of *V. ceranae* in both DNA of collected samples and DNA for standard curve.

The linear standard equation for *V. ceranae* quantification was generated by plotting the crossing point (Cp) versus the  $\log_{10}$  of the initial plasmid copy number as follows:

$y = -3.3043x + 37.909$ ,  $R^2 = 0.99$ . Real-time qPCR was performed by using iQ<sup>TM</sup>

SYBR® Green Supermix (Bio-Rad) in a CFX Connect Real-Time PCR Detection System (Bio-Rad). Total reaction volume of 20 µL was consisted of 10 µL 2× iQ™ SYBR® Green Supermix (Bio-Rad), 1 µL per forward (10 mM) and reverse primers (10 mM) and 1 µL DNA template. The qRT-PCR program was performed as follows: 95 °C for 3 min, 40 cycle at 95 °C for 10 s, 59 °C for 30 s All samples were performed in five repeats. Convert the qPCR result to the spore number by formula:  $\text{copy number} \times 2 \times 100 \times 100.2$  was back calculation for the dilution of DNA extraction, one of 100 was for the diluted after DNA extraction and other was used 1 µL 100× DNA for qPCR.

### **Supplementary Figure 1**

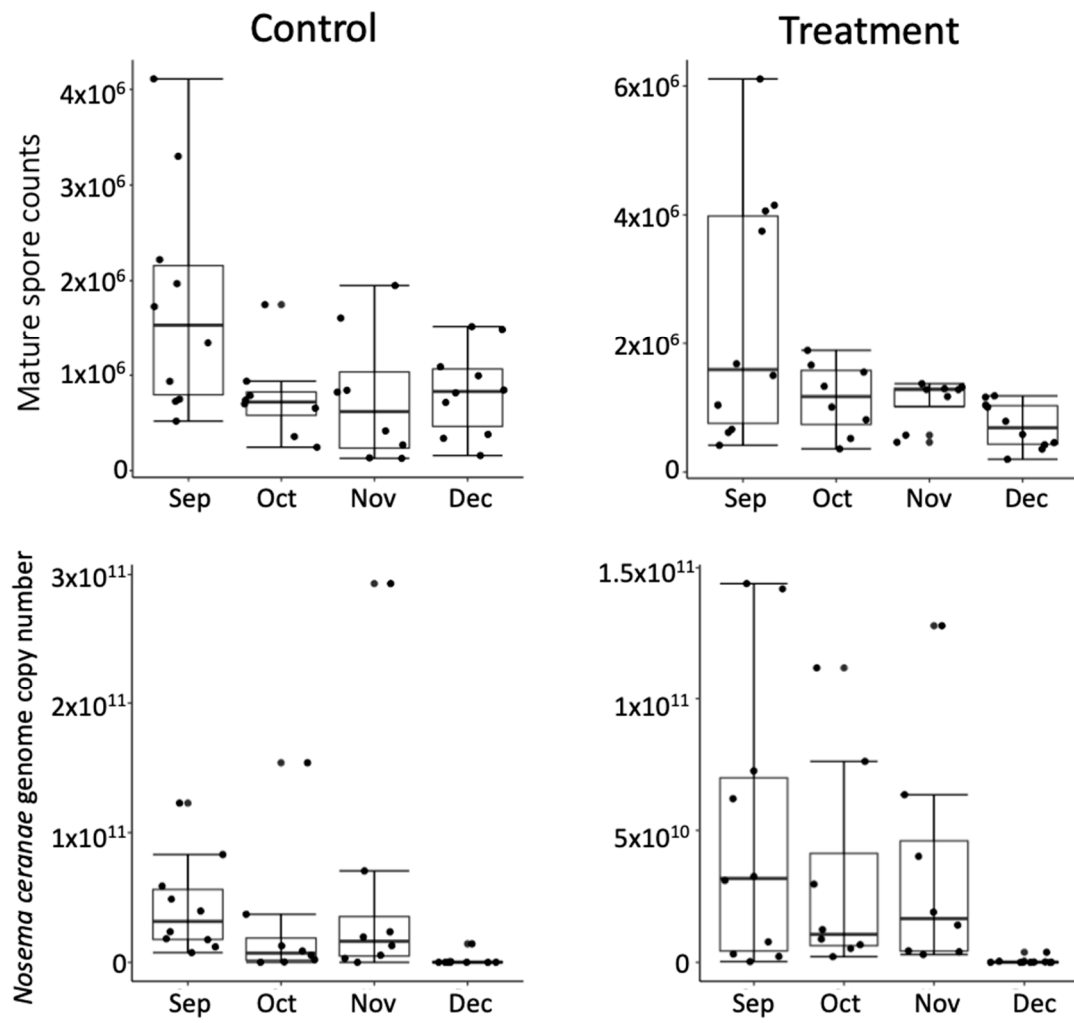

**Figure S1.** Total spore counts and genome copy numbers of the control group (A and C) and treatment group (B and D) from September to December.
